# Supplementary material for: Joint inflammation related citrullination of functional arginines in extracellular proteins
Source: PubMed Central journal article supplement (PMC5557964; doi:10.1038/s41598-017-08597-4), 2017-08-15
Supplement: 41598_2017_8597_MOESM1_ESM.pdf [file 41598_2017_8597_MOESM1_ESM.pdf]

***Joint inflammation related citrullination of functional arginines in extracellular proteins***

Kalle H. Sipilä,<sup>1</sup> Vipin Ranga,<sup>2</sup> Pekka Rappu,<sup>1</sup> Markku Mali,<sup>3</sup> Laura Pirilä,<sup>3</sup> Ilona Heino,<sup>1</sup> Johanna Jokinen,<sup>1</sup> Jarmo Käpylä,<sup>1</sup> Mark S. Johnson<sup>2</sup> & Jyrki Heino<sup>1,\*</sup>

<sup>1</sup>Department of Biochemistry, University of Turku, Turku, Finland. <sup>2</sup>Structural Bioinformatics Laboratory, Biochemistry, Faculty of Science and Engineering, Åbo Akademi University, Turku, Finland. <sup>3</sup>Turku University Hospital, Division of Medicine, Department of Rheumatology, and University of Turku, Turku, Finland.

**Supplementary information**

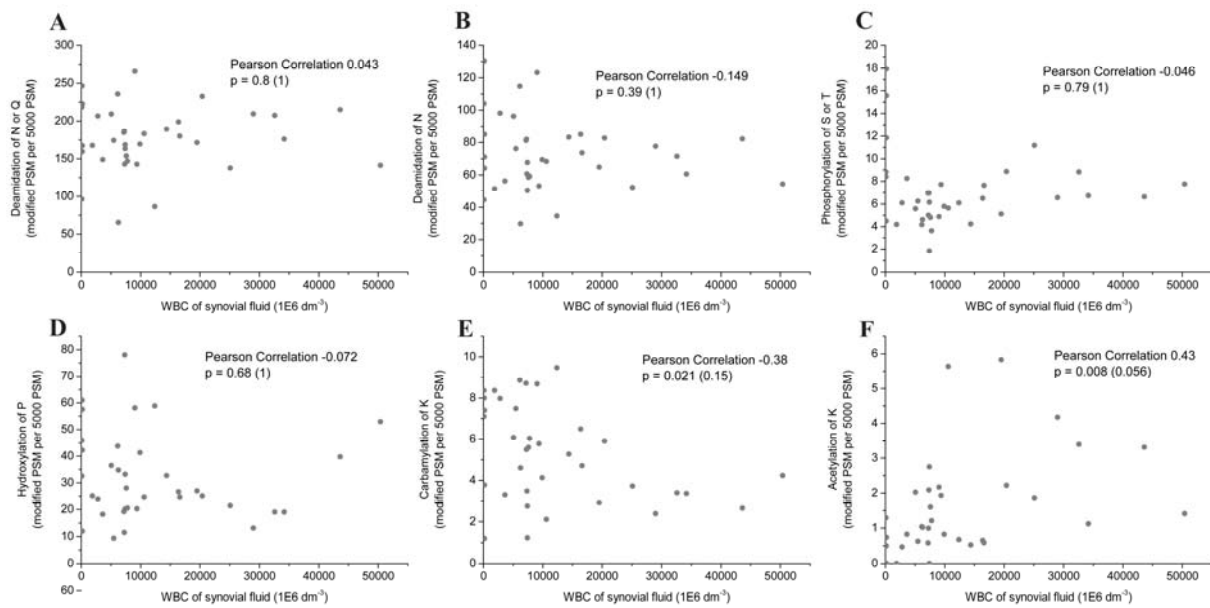

**Supplementary Figure 1.** The global analysis of deamidation (A-B), phosphorylation (C), hydroxylation (D), carbamylation (E) and acetylation (F). The analysis was performed by LC-MS/MS of heparin-agarose fractionated synovial fluids collected from joint inflammatory patients ( $n = 40$ ). Peptide-spectrum-matches (PSM) were normalized to 5000 PSM per sample. The number of PTM-containing PSM was correlated to white blood count of synovial fluid (WBC). The Bonferroni-corrected p-values are in parenthesis.

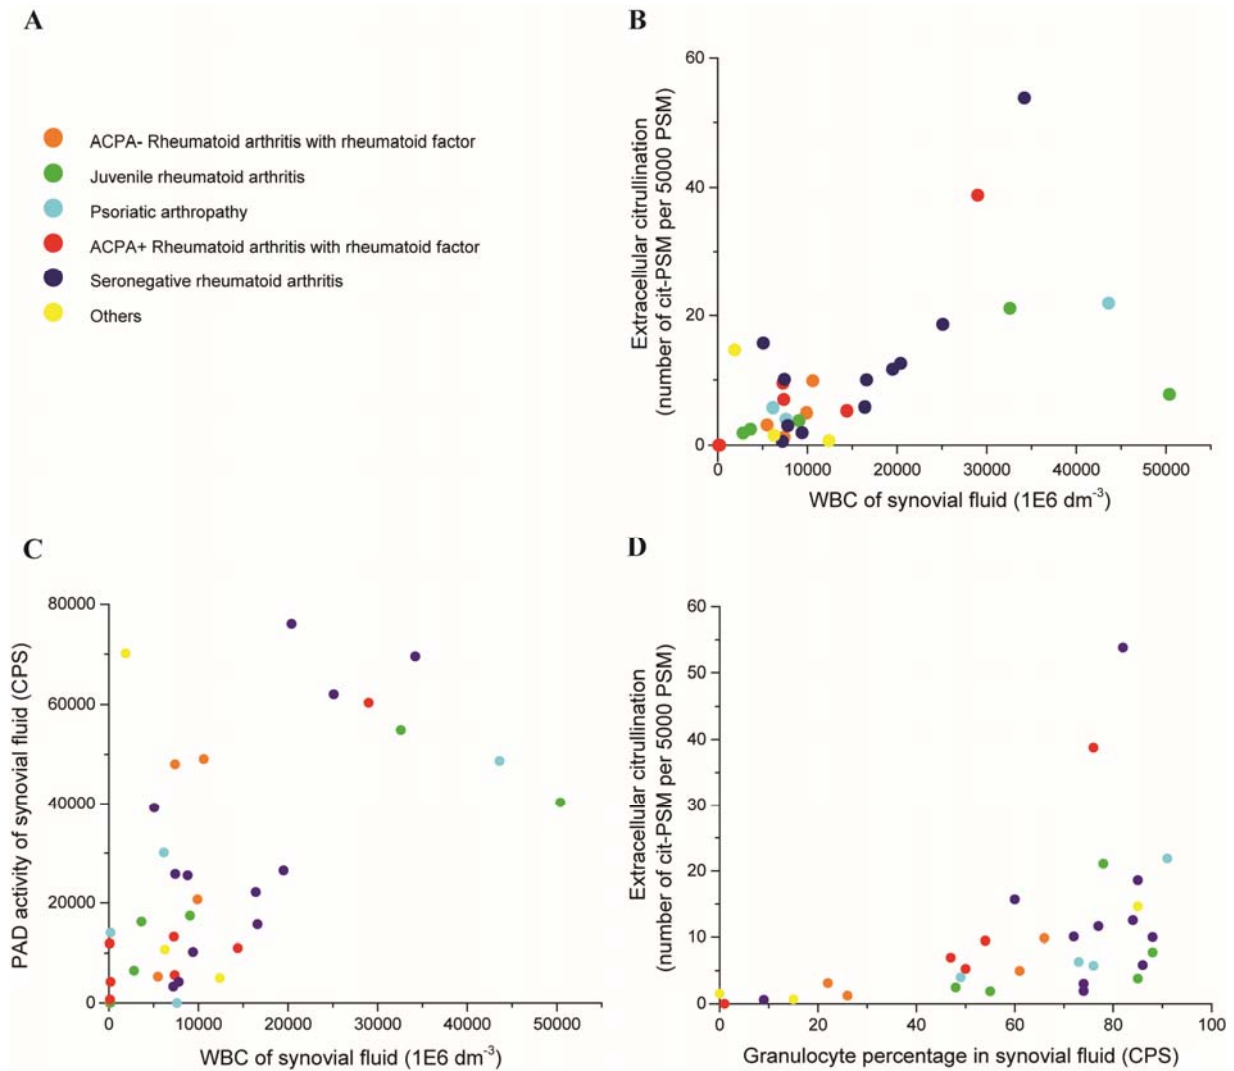

**Supplementary Figure 2.** Extracellular citrullination in synovial fluid does not show obvious differences between clinical diagnoses. (A) Classification of the patients by 8 different clinical diagnoses (RF = rheumatoid factor, ACPA anti-citrullinated protein antibodies). (B-D) Extracellular citrullination or PAD activity of synovial fluid shown as a function of white blood count (WBC) or granulocyte percentage.

**Supplementary Table 1.** Citrullinated proteins and arginine residues *in vivo*.

| Function                               | Gene Symbol | Protein name                                             | Citrullination site (mature peptide)                 |
|----------------------------------------|-------------|----------------------------------------------------------|------------------------------------------------------|
| Immune system                          | C3          | Complement C3                                            | R682                                                 |
|                                        | CFH         | Complement factor H                                      | R1192                                                |
|                                        | IGHM        | Ig mu chain C region                                     | R120                                                 |
| Growth factors                         | ANG         | Angiogenin                                               | R66                                                  |
|                                        | MST1        | Hepatocyte growth factor-like protein                    | R465                                                 |
|                                        | KNG1        | Kininogen-1                                              | R31<br>R374<br>R439                                  |
| Cell adhesion and extracellular matrix | COL3A1      | Collagen III                                             | R285                                                 |
|                                        | COMP        | Cartilage oligomeric matrix protein                      | R227                                                 |
|                                        | EFEMP1      | EGF-containing fibulin-like extracellular matrix protein | R131                                                 |
|                                        | FBN1        | Fibrillin-1                                              | R18                                                  |
|                                        | FN1         | Fibronectin                                              | R234<br>R409<br>R1131<br>R1542<br>R2325              |
|                                        | FGA         | Fibrinogen alpha chain                                   | R104<br>R110<br>R252<br>R491<br>R554<br>R572<br>R602 |
|                                        | MXRA5       | Matrix-remodeling-associated protein 5                   | R736                                                 |
|                                        | PAPLN       | Papilin                                                  | R824                                                 |
|                                        | PCOLCE      | Procollagen C-endopeptidase enhancer 1                   | R418                                                 |
|                                        | PRG4        | Proteoglycan 4                                           | R1367<br>R1276<br>R1293<br>R1300<br>R56<br>R168      |
|                                        | RARRES2     | Retinoic acid receptor responder protein 2               | R105                                                 |
| Protease inhibitors and proteases      | CTSG        | Cathepsin G                                              | R64                                                  |

|        |       |                                              |                                                                                |
|--------|-------|----------------------------------------------|--------------------------------------------------------------------------------|
|        |       |                                              | R74<br>R136<br>R136 and R142<br>R150 and R152<br>R165 and R172<br>R172<br>R212 |
|        | ITIH4 | Inter-alpha-trypsin inhibitor heavy chain H4 | R617<br>R621                                                                   |
|        | ELANE | Neutrophil elastase                          | R117                                                                           |
|        | F2    | Prothrombin                                  | R437                                                                           |
|        | PLG   | Plasminogen                                  | R70                                                                            |
|        | AMBP  | Protein AMBP                                 | R121<br>R166<br>R278                                                           |
| Others | ALB   | Albumin                                      | R87<br>R263                                                                    |
|        | APOA4 | Apolipoprotein A-IV                          | R259                                                                           |
|        | APOE  | Apolipoprotein E                             | R167<br>R172<br>R180<br>R189<br>R213                                           |

**Supplementary Table 2.** *In vivo* citrullinated arginine residues with known function.

| <b>Citrullination site (mature peptide)</b> | <b>Protein name</b>                   | <b>Function of the arginine</b>                                                           | <b>Reference</b>                                                               |
|---------------------------------------------|---------------------------------------|-------------------------------------------------------------------------------------------|--------------------------------------------------------------------------------|
| R66                                         | Angiogenin                            | Needed for angiogenic activity                                                            | Shapiro and Vallee (1992)                                                      |
| R172                                        | Apolipoprotein E                      | Needed for ApoE binding to LDL receptor                                                   | Morrow et al. (2000)                                                           |
| R136                                        | Cathepsin G                           | Needed for bactericidal activity                                                          | Shafer et al. (1996)                                                           |
| R285                                        | Collagen III                          | Binding site of collagen receptor integrins, "GAOGER"                                     | Siljander et al. (2004)                                                        |
| R1192                                       | Complement factor H                   | Mutation causes age-related macular degeneration and haemolytic uraemic syndrome          | Carioli et al. (2001), Perkins and Goodship (2002), Raychaudhuri et al. (2012) |
| R104                                        | Fibrinogen alpha chain                | Plasmin cleavage site                                                                     | UniProtKB - P02671 (FIBA_HUMAN)                                                |
| R110                                        |                                       | Mutation causes hypofibrinogenemia                                                        | Asselta et al. (2015)                                                          |
| R554                                        |                                       | Mutation associates with abnormal fibrin polymerization and thrombophilia and amyloidosis | Benson et al. (1993), Koopman et al. (1993)                                    |
| R572                                        |                                       | Binding site of integrins, "RGD"                                                          | Plow et al. (1987)                                                             |
| R234                                        | Fibronectin                           | Binding site of integrins, "isoDGR"                                                       | Curnis et al. (2006)                                                           |
| R465                                        | Hepatocyte growth factor-like protein | Cleavage site for proteolytic activation                                                  | Ganesan et al. (2011)                                                          |
| R437                                        | Prothrombin                           | Mutation impairs the fibrinogen clotting activity                                         | Miyata et al. (1987)                                                           |

**Supplementary Table 3.** Structural analysis of citrullination sites *in vivo*.

| Uniprot ID | Protein                             | Sequence*                    | Extended sequence                    | arginine residue position in PDB file | PDB ID/Chain    | Side chain orientation           | Secondary structure  | N-2 (Size)                        |
|------------|-------------------------------------|------------------------------|--------------------------------------|---------------------------------------|-----------------|----------------------------------|----------------------|-----------------------------------|
| P03950     | Angiogenin                          | AlcENKNG<br>NPH#ENLR         | AlcENKN<br>GNPH#E<br>NLR             | 66                                    | 1H52/A          | exposed                          | beta turn            | Pro<br>(Small)                    |
| P02649     | Apolipoprotein E                    | AQAWGE#L<br>R                | AQAWGE<br>#LRAR                      | 213                                   | 2L7B/A<br>(NMR) | exposed                          | alpha helix          | Gly<br>(Small)                    |
| P02649     | Apolipoprotein E                    | E#LGPLVEQ<br>GR              | AIRE#LGP<br>LVEQGR                   | 180                                   | 2L7B/A<br>(NMR) | exposed                          | alpha helix          | Arg<br>(Large)                    |
| P02649     | Apolipoprotein E                    | EGAE#GLSA<br>IR              | EGAE#GL<br>SAIR                      | 172                                   | 2L7B/A<br>(NMR) | exposed                          | alpha helix          | Ala<br>(Small)                    |
| P02649     | Apolipoprotein E                    | LAVYQAGA<br>#EGAER           | LAVYQAG<br>A#EGAER                   | 167                                   | 2L7B/A<br>(NMR) | exposed                          | loop                 | Gly<br>(Small)                    |
| P02649     | Apolipoprotein E                    | LGPLVEQG<br>#VR              | LGPLVEQ<br>G#VRAA                    | 189                                   | 2L7B/A<br>(NMR) | exposed                          | loop                 | Gln<br>(Large)                    |
| P49747     | Cartilage oligomeric matrix protein | FcPDGSPSE<br>cHEHADcVLE#DGSR | FcPDGSP<br>SEcHEHA<br>DcVLE#D<br>GSR | 247                                   | 3FBY/A          | exposed                          | beta turn            | Leu<br>(Large)                    |
| P08311     | Cathepsin G                         | #ENTQQHIT<br>AR              | NIQR#EN<br>TQQHIT<br>AR              | 76                                    | 1AU8/A          | exposed                          | loop                 | Gln<br>(Large)                    |
| P08311     | Cathepsin G                         | #GTDTL#EV<br>QLR             | VSMR#G<br>TDTL#EV<br>QLR             | 148, 156                              | 1AU8/A          | exposed,<br>partially<br>exposed | loop, beta<br>sheet  | Met<br>(Large),<br>Thr<br>(Small) |
| P08311     | Cathepsin G                         | REnTQQHIT<br>A#R             | REnTQQ<br>HITA#R                     | 86                                    | 1AU8/A          | exposed                          | beta sheet           | Thr<br>(Small)                    |
| P08311     | Cathepsin G                         | SSGVPPEVF<br>T#VSSFLPW<br>IR | SSGVPPE<br>VFT#VSSF<br>LPWIR         | 230                                   | 1AU8/A          | partially<br>exposed             | beta sheet           | Phe<br>(Large)                    |
| P08311     | Cathepsin G                         | VQ#D#QcL<br>R                | LRVQ#D#<br>QcLR                      | 164, 166                              | 1AU8/A          | exposed,<br>exposed              | loop, alpha<br>helix | Val<br>(Large),<br>Arg<br>(Large) |
| P08311     | Cathepsin G                         | VSm##GTD<br>TLR              | RVSmm##<br>GTDTLR                    | 147, 148                              | 1AU8/A          | exposed,<br>exposed              | loop, loop           | Ser<br>(Small),<br>Met<br>(Large) |
| P02461     | Collagen III                        | GAOGE#GR<br>OGLOGAAG<br>AR   | GAOGE#<br>GROGLO<br>GAAGAR           |                                       |                 |                                  |                      | Gly<br>(Small)                    |
| P01024     | Complement C3                       | ENPM#FSc<br>QR               | ENPM#FS<br>cQR                       | 82                                    | 2A73/B          | exposed                          | loop                 | Pro<br>(Small)                    |
| P01024     | Complement C3                       | SGQSED#Q<br>PVPQQM<br>TLK    | SGQSED#<br>QPVPQQ<br>QMTLK           | 551                                   | 2A73/A          | exposed                          | loop                 | Glu<br>(Large)                    |

|        |                                                          |                                            |                                                    |      |                 |                     |             |                |
|--------|----------------------------------------------------------|--------------------------------------------|----------------------------------------------------|------|-----------------|---------------------|-------------|----------------|
| P08603 | Complement factor H                                      | IVSSAMEPD<br>#EYHFGQAVR                    | IVSSAME<br>PD#EYHF<br>GQAVR                        | 148  | 2WII/C          | exposed             | loop        | Pro<br>(Small) |
| P08603 | Complement factor H                                      | LSS#SHTLR                                  | RLSS#SHT<br>LR                                     | 1210 | 3R62/A          | exposed             | loop        | Ser<br>(Small) |
| Q12805 | EGF-containing fibulin-like extracellular matrix protein | NPADPQ#I<br>PSNPSHR                        | NPADPQ<br>#IPSNPS<br>HR                            |      |                 |                     |             | Pro<br>(Small) |
| P35555 | Fibrillin-1                                              | #GGGGHD<br>ALKGPNVc<br>GSR                 | RAKR#GG<br>GGHDAL<br>KGPVcG<br>SR                  | 45   | 2M74/A<br>(NMR) | exposed             | loop        | Lys<br>(Large) |
| P02671 | Fibrinogen alpha chain                                   | DNTYN#VS<br>EDLR                           | DNTYN#V<br>SEDLR                                   | 110  | 3GHG/A          | exposed             | alpha helix | Tyr<br>(Large) |
| P02671 | Fibrinogen alpha chain                                   | ESSSHHPGI<br>AEFPS#GK                      | ESSSHHP<br>GIAEFPS#<br>GKSS                        |      | 3GHG/A          | missing, C-terminal |             | Pro<br>(Small) |
| P02671 | Fibrinogen alpha chain                                   | EVVTSEDS<br>DcPEAMD<br>LTLGIGTL<br>DGF#HR  | EVVTSED<br>GSDcPEA<br>MDLGTLS<br>GIGTLDG<br>F#HRHP |      | 3GHG/A          | missing, C-terminal |             | Gly<br>(Small) |
| P02671 | Fibrinogen alpha chain                                   | GDFSSANN<br>#DNTYNR                        | GDFSSAN<br>N#DNTY<br>NR                            | 104  | 3GHG/A          | exposed             | alpha helix | Asn<br>(Small) |
| P02671 | Fibrinogen alpha chain                                   | MADEAGSE<br>ADHEGTHS<br>TK#GHAK            | MADEAG<br>SEADHEG<br>THSTK#G<br>HAK                |      |                 |                     |             | Thr<br>(Small) |
| P02671 | Fibrinogen alpha chain                                   | MELERPGG<br>NEIT#GGST<br>SYGTGSETE<br>SPR  | MELERPG<br>GNEIT#G<br>GTSYGT<br>GSETES<br>R        |      | 3GHG/A          | missing             |             | Ile<br>(Large) |
| P02671 | Fibrinogen alpha chain                                   | QFTSSTSYN<br>#GDSTFESK                     | QFTSSTS<br>YN#GDST<br>FESK                         |      |                 |                     |             | Tyr<br>(Large) |
| P02751 | Fibronectin                                              | GNULLQcIcT<br>GNG#GEW<br>K                 | GNULLQcIc<br>TGNG#G<br>EWK                         | 234  | 3EJH/A          | exposed             | beta sheet  | Asn<br>(Small) |
| P02751 | Fibronectin                                              | RPGGEPSP<br>E<br>GTTGQSYN<br>QYSQ#YHQ<br>R | RPGGEP<br>S<br>PEGTTGQ<br>SYNQYSQ<br>#YHQ<br>R     |      |                 |                     |             | Ser<br>(Small) |
| P02751 | Fibronectin                                              | WLPSSSPVT<br>GY#VTTTPK                     | WLPSSSP<br>VTGY#VT<br>TTPK                         |      |                 |                     |             | Gly<br>(Small) |
| P02751 | Fibronectin                                              | DGQE#DAP<br>IVNK                           | DGQE#D<br>APIVNK                                   |      |                 |                     |             | Gln<br>(Large) |
| P02751 | Fibronectin                                              | #DNmKWc<br>GTTQNYDA<br>DQK                 | SEGR#DN<br>mKWcGT<br>TQNYDA<br>DQK                 | 440  | 3M7P/A          | exposed             | loop        | Gly<br>(Small) |



|        |                                              |                                            |                                                      |     |        |                     |            |                |
|--------|----------------------------------------------|--------------------------------------------|------------------------------------------------------|-----|--------|---------------------|------------|----------------|
| P26927 | Hepatocyte growth factor-like protein        | cGSEAQP#<br>QEATTVScF<br>R                 | cGSEAQP<br>#QEATTV<br>ScFR                           |     |        |                     |            | Gln<br>(Large) |
| P26927 | Hepatocyte growth factor-like protein        | L#VVGGHP<br>GNPWTVSL<br>LR                 | RSKL#VV<br>GGHPGN<br>SPWTVSL<br>R                    | 483 | 4QT8/C | exposed             | loop       | Lys<br>(Large) |
| P01871 | Ig mu chain C region                         | VSVFVPP#D<br>GFFGNPR                       | VSVFVPP<br>#DGFFGN<br>PR                             |     |        |                     |            | Pro<br>(Small) |
| Q14624 | Inter-alpha-trypsin inhibitor heavy chain H4 | #GWNRQA<br>GAAGSR                          | FSPR#G<br>WNRQAG<br>AAGSR                            |     |        |                     |            | Pro<br>(Small) |
| Q14624 | Inter-alpha-trypsin inhibitor heavy chain H4 | RGWN#QA<br>GAAGSR                          | RGWN#Q<br>AGAAGS<br>R                                |     |        |                     |            | Trp<br>(Large) |
| P01042 | Kininogen-1                                  | DQGHGHQ<br>#GHGLGHG<br>HEQQHGLG<br>HGHK    | DQGHGH<br>Q#GHGL<br>GHGHEQ<br>QHGLGH<br>GHK          |     |        |                     |            | His<br>(Large) |
| P01042 | Kininogen-1                                  | HE#DQGHG<br>HQ#GHGLG<br>HGHEQQH<br>GLGHGHK | HKHE#D<br>QGHHGQ<br>#GHGLG<br>HGHEQQ<br>HGLGHG<br>HK |     |        |                     |            | His<br>(Large) |
| Q9NR99 | Matrix-remodeling-associated protein 5       | HSEKEPETN<br>VAEG#R                        | HSEKEPE<br>TNVAEG#<br>RVFE                           |     |        |                     |            | Glu<br>(Large) |
| P08246 | Neutrophil elastase                          | #LGNGVQc<br>LAMGWGL<br>LGR                 | AQGR#L<br>GNGVQc<br>LAMGW<br>LLGR                    | 129 | 2Z7F/E | exposed             | loop       | Gly<br>(Small) |
| O95428 | Papilin                                      | STHTDGGG<br>SSPSGEQEP<br>SQH#TGAA<br>VQR   | STHTDGG<br>GSSPSGE<br>QEPSQH#<br>TGAAVQ<br>R         |     |        |                     |            | Gln<br>(Large) |
| P00747 | Plasminogen                                  | M#DVVLF<br>EK                              | IIRM#DV<br>VLF EK                                    | 70  | 4DUR/A | solvent<br>exposed  | beta sheet | Arg<br>(Large) |
| Q15113 | Procollagen C-endopeptidase enhancer 1       | KcPSQPV#A<br>AASQD                         | KcPSQPV<br>#AAASQ<br>D                               |     | 1UAP/A | missing, C-terminal |            | Pro<br>(Small) |
| P02760 | Protein AMBP                                 | FS#HHGPTI<br>TAK                           | KKFS#HH<br>GPTITAK                                   | 121 | 3QKG/A | exposed             | loop       | Phe<br>(Large) |
| P02760 | Protein AMBP                                 | GPc#AFIQL<br>WAFDAVK                       | RGPC#AFI<br>QLWAFD<br>AVK                            | 92  | 1BIK/A | exposed             | loop       | Pro<br>(Small) |
| Q92954 | Proteoglycan 4                               | AIGPSQTH<br>I#IQYSPAR                      | AIGPSQT<br>HTI#IQY<br>SPAR                           |     |        |                     |            | Thr<br>(Small) |
| Q92954 | Proteoglycan 4                               | AITT#SGQT<br>LSK                           | AITT#SG<br>QTLSK                                     |     |        |                     |            | Thr<br>(Small) |

|        |                                                     |                                 |                                      |     |        |                      |            |                |
|--------|-----------------------------------------------------|---------------------------------|--------------------------------------|-----|--------|----------------------|------------|----------------|
| Q92954 | Proteoglycan 4                                      | cFESFE#GR                       | cFESFE#G<br>REC                      |     |        |                      |            | Phe<br>(Large) |
| Q92954 | Proteoglycan 4                                      | IQYSPA#LA<br>YQDK               | IQYSPA#L<br>AYQDK                    |     |        |                      |            | Pro<br>(Small) |
| Q92954 | Proteoglycan 4                                      | NSAAN#EL<br>QK                  | NSAAN#E<br>LQK                       |     |        |                      |            | Ala<br>(Small) |
| Q92954 | Proteoglycan 4                                      | RPALNYPVY<br>GETTQV#R           | RPALNYP<br>VYGETTQ<br>V#RRRF         |     |        |                      |            | Gln<br>(Large) |
| P00734 | Prothrombin                                         | ENLD#DIAL<br>MK                 | ENLD#DI<br>ALMK                      | 418 | 4NZQ/A | partially<br>exposed | loop       | Leu<br>(Large) |
| P00734 | Prothrombin                                         | G#VTGWG<br>NLK                  | GYKG#VT<br>GWGNLK                    | 457 | 4NZQ/A | buried               | beta sheet | Lys<br>(Large) |
| Q99969 | Retinoic acid<br>receptor<br>responder protein<br>2 | LVHcPIETQ<br>VL#EAEH<br>QETQcLR | LVHcPIET<br>QVL#EAE<br>EHQETQc<br>LR |     |        |                      |            | Val<br>(Large) |

\* # denotes *in vivo* citrullinated arginine

**Supplementary Table 4.** Structural analysis of fibronectin citrullination *in vitro*.

| Site        | Sequence               | PDB ID/Chain         | arginine residue position in PDB file | Secondary Structure               | Side chain orientation     | N-2 (Size)               |
|-------------|------------------------|----------------------|---------------------------------------|-----------------------------------|----------------------------|--------------------------|
| R2325       | SQ#YH                  | No structure         |                                       |                                   |                            | Ser (Small)              |
| R409        | GR#DN                  | 3M7P/A               | 440                                   | loop                              | exposed                    | Gly (Small)              |
| R206        | DT#TS                  | 2RKY/A               | 206                                   | beta turn                         | exposed                    | Asp (Small)              |
| R210        | SY#IG                  | 2RKY/A               | 210                                   | beta strand C terminal            | exposed                    | Ser (Small)              |
| R206+R210   | DT#TSY#IG              | 2RKY/A, 2RKY/A       | 206, 210                              | beta turn, beta strand C terminal | exposed, exposed           | Asp (Small), Ser (Small) |
| R101        | RG#IS                  | 2CG6/A               | 101                                   | beta strand N terminal            | exposed                    | Arg (Large)              |
| R519        | QG#GR                  | 3GXE/A               | 550                                   | beta turn                         | exposed                    | Gln (Large)              |
| R1369       | SG#PR                  | 3T1W/A               | 1491                                  | loop                              | exposed                    | Ser (Small)              |
| R1004       | LT#RG                  | No structure         |                                       |                                   |                            | Leu (Large)              |
| R1542       | GY#VT                  | No structure         |                                       |                                   |                            | Gly (Small)              |
| R2218       | SS#WC                  | 2EC3/A (NMR)         | 18                                    | loop                              | exposed                    | Ser (Small)              |
| R234        | NG#GE                  | 2RKY/A               | 234                                   | beta turn                         | exposed                    | Asn (Small)              |
| R1004+R1005 | LT##GQ                 | No structure         |                                       |                                   |                            | Leu (Large), Thr (Small) |
| R1358       | GY#IR                  | 4LXO/A               | 1358                                  | beta strand                       | partially exposed          | Gly (Small)              |
| R1369+R1371 | SG#P#ED                | 4LXO/A               | 1369, 1371                            | loop, beta strand N terminal      | exposed, exposed           | Ser (Small), Arg (Large) |
| R197/R199   | TS#N#CN                | 2RKY/A               | 197, 199                              | loop, beta strand N terminal      | exposed, partially exposed | Thr (Small), Arg (Large) |
| R2213       | HF#CD                  | 2EC3/A (NMR)         | 13                                    | loop                              | exposed                    | His (Large)              |
| R1957       | IG#KK                  | 3R8Q/A               | 268                                   | beta strand                       | exposed                    | Ile (Large)              |
| R99         | AG#GR                  | 2CG6/A               | 99                                    | beta turn                         | exposed                    | Ala (Small)              |
| R613        | IL#WR                  | 2HA1/A (NMR)         | 36                                    | beta strand                       | partially exposed          | Ile (Large)              |
| R124/R125   | TW##PH                 | 2CG6/A               | 124, 125                              | beta strand, beta strand          | exposed, exposed           | Thr (Small), Trp (Large) |
| R83         | YE#PK                  | 1O9A/A (NMR)         | 83                                    | beta strand                       | exposed                    | Tyr (Large)              |
| R83+R99     | YE#PKDSMIW DCTCIGAG#GR | 1O9A/A (NMR), 2CG6/A | 83, 99                                | beta strand, beta turn            | exposed, exposed           | Tyr (Large), Ala (Small) |

|           |                         |                 |          |                             |                                               |                             |
|-----------|-------------------------|-----------------|----------|-----------------------------|-----------------------------------------------|-----------------------------|
| R613+R615 | IL#W#PK                 | 2HA1/A<br>(NMR) | 36, 38   | beta strand,<br>beta strand | partially<br>exposed,<br>partially<br>exposed | Ile (Large), Arg<br>(Large) |
| R221      | DN#GN                   | 2RKY/A          | 221      | beta turn                   | exposed                                       | Asp (Small)                 |
| R221+R234 | DN#GNNLLQ<br>CICTGNG#GE | 2RKY/A          | 221, 234 | beta turn,<br>beta turn     | exposed,<br>exposed                           | Asp (Small), Asn<br>(Small) |
| R241      | CE#HT                   | 2RKY/A          | 241      | loop C<br>terminal          | partially<br>exposed                          | Cys (Small)                 |
| R2295     | GQ#GW                   | No structure    |          |                             |                                               | Gly (Small)                 |
| R2235     | WD#QG                   | 2EC3/A<br>(NMR) | 35       | beta strand                 | exposed                                       | Trp (Large)                 |
| R1131     | QE#DA                   | No structure    |          |                             |                                               | Gln (Large)                 |

---

**Supplementary Table 5.** Sample and patient information.

| Sample Number | Gender | Age (at the moment of sampling) | Diagnosis           |                                                                                                          | ACPA |
|---------------|--------|---------------------------------|---------------------|----------------------------------------------------------------------------------------------------------|------|
| 2,17          | Female | 25                              | M08.4               | Pauciarticular juvenile rheumatoid arthritis                                                             | -    |
| 3             | Male   | 48                              | L40.5+M07.3         | Arthropathic psoriasis + other psoriatic arthropathy                                                     | -    |
| 4,5,28,29     | Female | 53                              | M06.9 (M31.3)       | Rheumatoid arthritis, unspecified (Wegener's granulomatosis)                                             | -    |
| 6,19          | Female | 43                              | M05.8               | Other rheumatoid arthritis with rheumatoid factor                                                        | -    |
| 7             | Female | 63                              | M05.8               | Other rheumatoid arthritis with rheumatoid factor                                                        | +    |
| 8             | Female | 74                              | M05.8               | Other rheumatoid arthritis with rheumatoid factor                                                        | -    |
| 9             | Male   | 49                              | L40.5+M07.3         | Arthropathic psoriasis + other psoriatic arthropathy                                                     | -    |
| 10            | Male   | 53                              | M10.9               | Gout, unspecified                                                                                        | -    |
| 11,16         | Female | 44                              | M06.8               | Other specified rheumatoid arthritis, unspecified site                                                   | -    |
| 12            | Female | 22                              | M08.3               | Juvenile rheumatoid polyarthritis (seronegative)                                                         | -    |
| 13            | Female | 51                              | M07.3               | Other psoriatic arthropathy                                                                              | -    |
| 14            | Female | 48                              | M06.0 (L40.5+M07.3) | Rheumatoid arthritis without rheumatoid factor, (Arthropathic psoriasis + other psoriatic arthropathies) | -    |
| 15            | Female | 63                              | M05.8               | Other rheumatoid arthritis with rheumatoid factor                                                        | +    |
| 18            | Female | 50                              | M08.0 (M05.8)       | Unspecified juvenile rheumatoid arthritis (Other rheumatoid arthritis with rheumatoid factor)            | +    |
| 20            | Female | 65                              | M05.8               | Other rheumatoid arthritis with rheumatoid factor                                                        | +    |
| 21            | Female | 48                              | M05.8               | Other rheumatoid arthritis with rheumatoid factor                                                        | -    |
| 22            | Female | 66                              | M05.8               | Other rheumatoid arthritis with rheumatoid factor                                                        | +    |
| 23,24         | Female | 61                              | M06.8               | Other specified rheumatoid arthritis, unspecified site                                                   | -    |
| 25            | Male   | 49                              | M06.8               | Other specified rheumatoid arthritis, unspecified site                                                   | -    |

|       |        |    |             |                                                         |   |
|-------|--------|----|-------------|---------------------------------------------------------|---|
| 26    | Female | 19 | M08.3       | Juvenile rheumatoid polyarthritis (seronegative)        | - |
| 27    | Female | 65 | M05.8       | Other rheumatoid arthritis with rheumatoid factor       | + |
| 30    | Female | 64 | M05.8       | Other rheumatoid arthritis with rheumatoid factor       | - |
| 31    | Female | 23 | M06.9       | Rheumatoid arthritis, unspecified                       | - |
| 32    | Male   | 18 | M08.3       | Juvenile rheumatoid polyarthritis (seronegative)        | - |
| 33,40 | Female | 60 | M06.0       | Rheumatoid arthritis without rheumatoid factor          | - |
| 34    | Male   | 43 | M45         | Ankylosing spondylitis                                  | - |
| 35    | Male   | 62 | M05.8       | Other rheumatoid arthritis with rheumatoid factor       | + |
| 36    | Male   | 24 | M08.3       | Juvenile rheumatoid polyarthritis (seronegative)        | - |
| 37    | Female | 49 | L40.5+M07.3 | Arthropathic psoriasis + other psoriatic arthropathy    | - |
| 38    | Male   | 55 | M13.9 L42   | Unspecified arthritis, multiple sites+ Pityriasis rosea | - |
| 39    | Female | 62 | M05.8       | Other rheumatoid arthritis with rheumatoid factor       | + |
| 41    | Male   | 54 | M06.0       | Rheumatoid arthritis without rheumatoid factor          | - |

## References

- Asselta R, Platè M, Robusto M, Borhany M, Guella I, Soldà G, Afrasiabi A, Menegatti M, Shamsi T, Peyvandi F, Duga S (2014) Clinical and molecular characterisation of 21 patients affected by quantitative fibrinogen deficiency. *Thromb. Haemost.* 113: 567–576
- Benson MD, Liepnieks J, Uemichi T, Wheeler G, Correa R (1993) Hereditary renal amyloidosis associated with a mutant fibrinogen  $\alpha$ -chain. *Nat. Genet.* 3: 252–255
- Caprioli J, Bettinaglio P, Zipfel PF, Amadei B, Daina E, Gamba S, Skerka C, Marziliano N, Remuzzi G, Noris M, Itaslian Registry of Familial and Recurrent HUS/TTP (2001) The molecular basis of familial hemolytic uremic syndrome: mutation analysis of factor H gene reveals a hot spot in short consensus repeat 20. *J. Am. Soc. Nephrol.* 12: 297–307
- Curnis F, Longhi R, Crippa L, Cattaneo A, Dondossola E, Bachi A, Corti A (2006) Spontaneous formation of L-isoaspartate and gain of function in fibronectin. *J. Biol. Chem.* 281: 36466–36476
- Ganesan R, Kolumam GA, Lin SJ, Xie M-H, Santell L, Wu TD, Lazarus RA, Chaudhuri A, Kirchhofer D (2011) Proteolytic Activation of Pro-Macrophage-Stimulating Protein by Hepsin. *Mol. Cancer Res.* 9: 1175–1186
- Koopman J, Haverkate F, Grimbergen J, Lord ST, Mosesson MW, DiOrio JP, Siebenlist KS, Legrand C, Soria J, Soria C (1993) Molecular basis for fibrinogen Dusart (A alpha 554 Arg--&gt;Cys) and its association with abnormal fibrin polymerization and thrombophilia. *J. Clin. Invest.* 91: 1637–1643
- Miyata T, Morita T, Inomoto T, Kawauchi S, Shirakami A, Iwanaga S (1987) Prothrombin Tokushima, a replacement of arginine-418 by tryptophan that impairs the fibrinogen clotting activity of derived thrombin Tokushima. *Biochemistry* 26: 1117–1122
- Morrow JA, Arnold KS, Dong J, Balestra ME, Innerarity TL, Weisgraber KH (2000) Effect of Arginine 172 on the Binding of Apolipoprotein E to the Low Density Lipoprotein Receptor. *J. Biol. Chem.* 275: 2576–2580
- Perkins SJ, Goodship TH. (2002) Molecular modelling of the C-terminal domains of factor H of human complement: a correlation between haemolytic uraemic syndrome and a predicted heparin binding site. *J. Mol. Biol.* 316: 217–224
- Plow EF, Pierschbacher MD, Ruoslahti E, Marguerie G, Ginsberg MH (1987) Arginyl-glycyl-aspartic acid sequences and fibrinogen binding to platelets. *Blood* 70: 110–115
- Raychaudhuri S, Iartchouk O, Chin K, Tan PL, Tai AK, Ripke S, Gowrisankar S, Vemuri S, Montgomery K, Yu Y, Reynolds R, Zack DJ, Campochiaro B, Campochiaro P, Katsanis N, Daly MJ, Seddon JM (2011) A rare penetrant mutation in CFH confers high risk of age-related macular degeneration. *Nat. Genet.* 43: 1232–1236
- Shafer WM, Hubalek F, Huang M, Pohl J (1996) Bactericidal activity of a synthetic peptide (CG 117-136) of human lysosomal cathepsin G is dependent on arginine content. *Infect. Immun.* 64: 4842–4845
- Shapiro R, Vallee BL (1992) Identification of functional arginines in human angiogenin by site- directed mutagenesis. *Biochemistry* 31: 12477–12485
- Siljander PR-M, Hamaia S, Peachey AR, Slatter DA, Smethurst PA, Ouwehand WH, Knight CG, Farndale RW (2004) Integrin activation state determines selectivity for novel recognition sites in fibrillar collagens. *J. Biol. Chem.* 279: 47763–47772
